# Supplementary material for: Hybrid Lipid Nanoformulations for Hepatoma Therapy: Sorafenib Loaded Nanoliposomes—A Preliminary Study
Source: MDPI journal article supplement (doi:10.3390/nano12162833), 2022-08-17
Supplement: s1 [file s1]

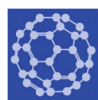

## Article

# Hybrid Lipid Nanoformulations for Hepatoma Therapy: Sorafenib Loaded Nanoliposomes—A Preliminary Study

Adrian Bartos <sup>1,2</sup>, Ioana Iancu <sup>3,\*</sup>, Lidia Ciobanu <sup>1</sup>, Anca Onaciu <sup>4,5</sup>, Cristian Moldovan <sup>4,5</sup>, Alin Moldovan <sup>4</sup>, Radu Cristian Moldovan <sup>4</sup>, Adrian Bogdan Tigu <sup>4</sup>, Gabriela Fabiola Stiufiuc <sup>6</sup>, Valentin Toma <sup>4</sup>, Cornel Iancu <sup>1</sup>, Nadim Al Hajjar <sup>1,2</sup> and Rares Ionut Stiufiuc <sup>4,5,\*</sup>

<sup>1</sup> Department of Surgery, Regional Institute of Gastroenterology and Hepatology, 400162 Cluj-Napoca, Romania

<sup>2</sup> Department of Surgery, "Iuliu Hatieganu" University of Medicine and Pharmacy, 400337 Cluj-Napoca, Romania

<sup>3</sup> Department of Surgery, Medcover Hospital, 407062 Cluj-Napoca, Romania

<sup>4</sup> MedFuture—Research Center for Advanced Medicine, "Iuliu Hatieganu" University of Medicine and Pharmacy, 400337 Cluj-Napoca, Romania

<sup>5</sup> Department of Pharmaceutical Physics-Biophysics, "Iuliu Hatieganu" University of Medicine and Pharmacy, 400349 Cluj-Napoca, Romania

<sup>6</sup> Faculty of Physics, "Babes Bolyai" University, 400084 Cluj-Napoca, Romania

\* Correspondence: iancuioana2011@gmail.com (I.I.); rares.stiufiuc@umfcluj.ro (R.I.S.); Tel.: +40-747-795-612 (I.I.); +40-726-340-278 (R.I.S.)

**Citation:** Bartos, A.; Iancu, I.; Ciobanu, L.; Onaciu, A.; Moldovan, C.; Moldovan, A.; Moldovan, R.C.; Tigu, A.B.; Stiufiuc, G.F.; Toma, V.; et al. Hybrid Lipid Nanoformulations for Hepatoma Therapy: Sorafenib Loaded Nanoliposomes—A Preliminary Study. *Nanomaterials* **2022**, *12*, 2833. <https://doi.org/10.3390/nano12162833>

Academic Editor: Zili Sideratou

Received: 28 June 2022

Accepted: 11 August 2022

Published: 17 August 2022

**Publisher's Note:** MDPI stays neutral with regard to jurisdictional claims in published maps and institutional affiliations.

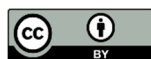

**Copyright:** © 2022 by the authors. Submitted for possible open access publication under the terms and conditions of the Creative Commons Attribution (CC BY) license (<https://creativecommons.org/licenses/by/4.0/>).

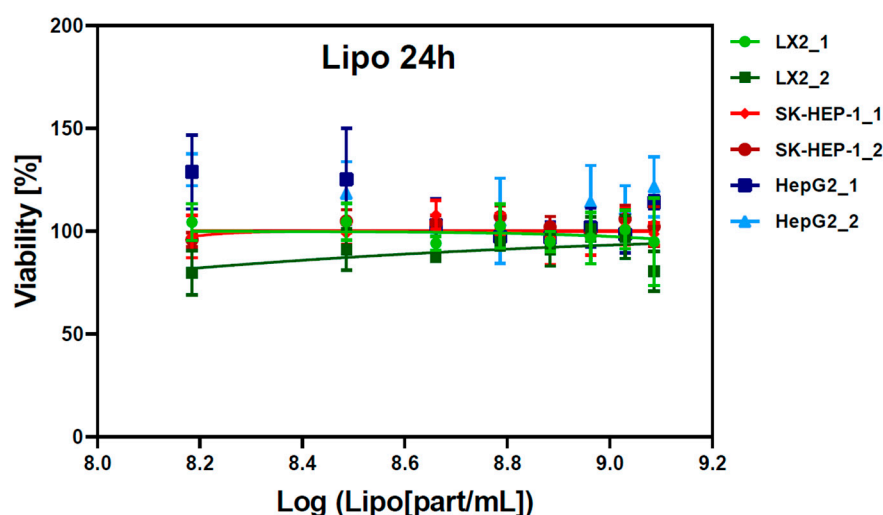

**Figure S1.** Evaluation of IC<sub>50</sub> doses of Lipo treatment at 24 h. The experiments were performed on duplicate for each cell line.

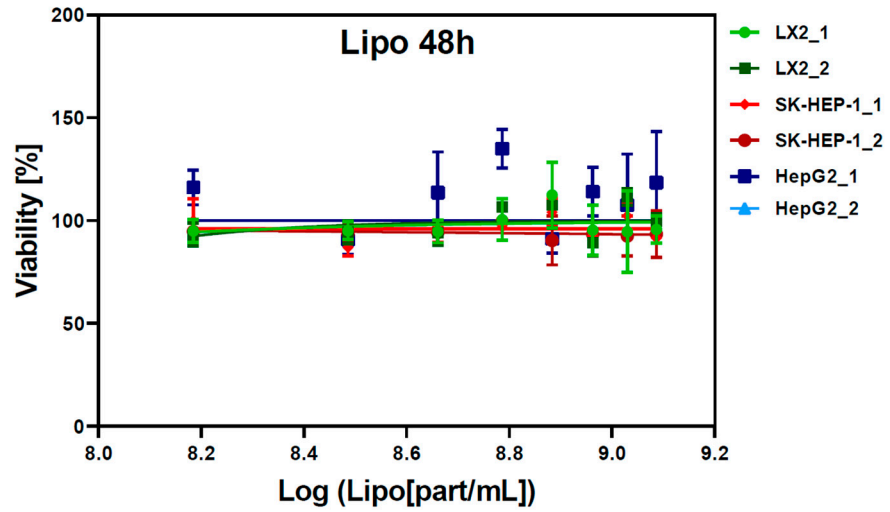

**Figure S2.** Evaluation of IC<sub>50</sub> doses of Lipo at 48 h. The experiments were performed on duplicate for each cell line.

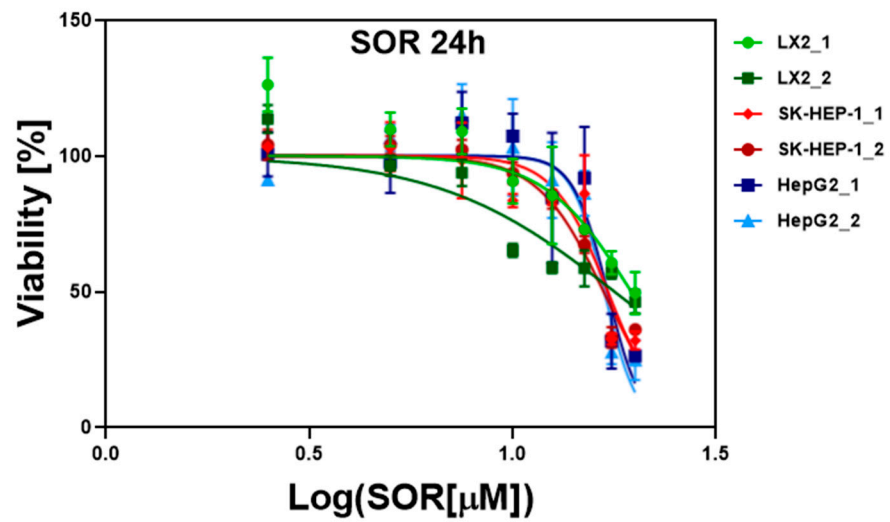

**Figure S3.** Evaluation of IC<sub>50</sub> doses of SOR treatment at 24 h. The experiments were performed on duplicate for each cell line.

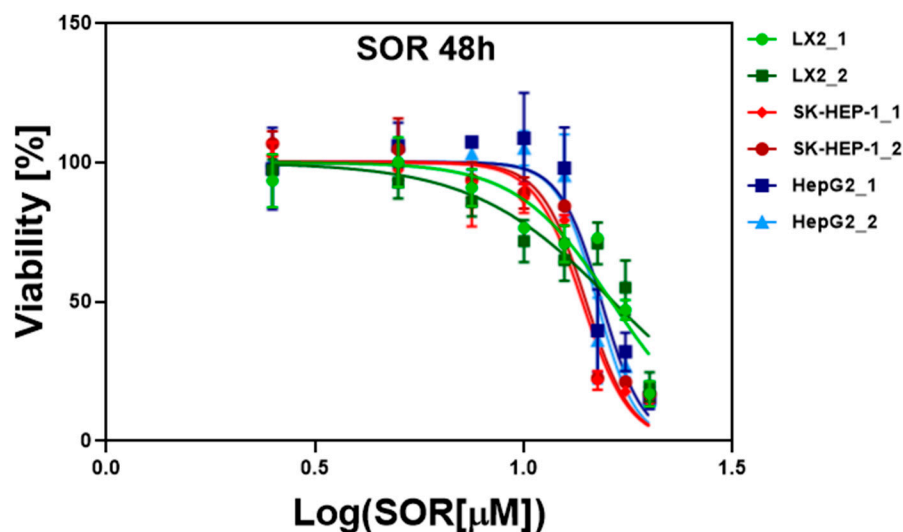

**Figure S4.** Evaluation of IC<sub>50</sub> doses of SOR treatment at 48 h. The experiments were performed on duplicate for each cell line.

**Table S1.** Statistical analysis in the case of blank liposomes treatments effect on 24 and 48 h.

| Cell line       | 1.22E+09<br>part/ml | 1.07E+09<br>part/ml | 9.17E+08<br>part/ml | 7.64E+08<br>part/ml | 6.11E+08<br>part/ml | 4.58E+08<br>part/ml | 3.06E+08<br>part/ml | 1.53E+08<br>part/ml |
|-----------------|---------------------|---------------------|---------------------|---------------------|---------------------|---------------------|---------------------|---------------------|
| Duplicate 1 24h |                     |                     |                     |                     |                     |                     |                     |                     |
| LX2             | 0.769328            | 0.947867            | 0.817012            | 0.678590            | 0.849069            | 0.624289            | 0.723553            | 0.735599            |
| SKHEP           | 0.772832            | 0.730028            | 0.857338            | 0.107944            | 0.458241            | 0.179640            | 0.795779            | 0.702046            |
| HEPG2           | 0.045177            | 0.848654            | 0.810619            | 0.648596            | 0.588334            | 0.761715            | 0.167473            | 0.063622            |
| Duplicate 2 24h |                     |                     |                     |                     |                     |                     |                     |                     |
| LX2             | 0.087038            | 0.765906            | 0.898290            | 0.308474            | 0.419783            | 0.126129            | 0.365206            | 0.088683            |
| SKHEP           | 0.757732            | 0.328753            | 0.715451            | 0.695232            | 0.219940            | 0.411216            | 0.367465            | 0.375057            |
| HEPG2           | 0.172483            | 0.422020            | 0.380560            | 0.833452            | 0.755598            | 0.860321            | 0.235949            | 0.050281            |
| Duplicate 1 48h |                     |                     |                     |                     |                     |                     |                     |                     |
| LX2             | 0.438823            | 0.677189            | 0.584409            | 0.268253            | 0.946938            | 0.310058            | 0.293018            | 0.321055            |
| SKHEP           | 0.024743 ↑*         | 0.621539            | 0.043293 ↑*         | 0.417953            | 0.272675            | 0.094648            | 0.018794 ↑*         | 0.990909            |
| HEPG2           | 0.256268            | 0.294356            | 0.710103            | 0.971164            | 0.009092 ↑**        | 0.947129            | 0.564198            | 0.023731 ↑*         |
| Duplicate 2 48h |                     |                     |                     |                     |                     |                     |                     |                     |
| LX2             | 0.087038            | 0.765906            | 0.898290            | 0.308474            | 0.419783            | 0.126129            | 0.365206            | 0.088683            |
| SKHEP           | 0.388417            | 0.276780            | 0.054595            | 0.244687            | 0.852371            | 0.053357            | 0.111586            | 0.048279 ↑*         |
| HEPG2           | 0.172483            | 0.422020            | 0.380560            | 0.833452            | 0.755598            | 0.860321            | 0.235949            | 0.050281            |

↑ - increased viability; ↓ - decreased viability; P-value <0.05 (\*), P-value <0.01 (\*\*) and P-value <0.001 (\*\*).

Discovery determined using the Two-stage linear step-up procedure of Benjamini, Krieger and Yekutieli, with Q = 1%.

Each row was analyzed individually, without assuming a consistent SD. Number of t tests: 3.

**Table S2.** Statistical analysis in the case of Sorafenib treatments effect on 24 and 48 h.

| Cell line       | 20 $\mu$ M           | 17.5 $\mu$ M     | 15 $\mu$ M       | 12.5 $\mu$ M     | 10 $\mu$ M      | 7.5 $\mu$ M | 5 $\mu$ M | 2.5 $\mu$ M    |
|-----------------|----------------------|------------------|------------------|------------------|-----------------|-------------|-----------|----------------|
| Duplicate 1 24h |                      |                  |                  |                  |                 |             |           |                |
| LX2             | 0.001208<br>↓***     | 0.001287<br>↓*** | 0.003413<br>↓*** | 0.263599         | 0.218253        | 0.229341    | 0.151472  | 0.021292<br>↓* |
| SKHEP           | 0.000308<br>↓***     | 0.000279<br>↓*** | 0.233513         | 0.050174         | 0.044889<br>↓*  | 0.874839    | 0.675029  | 0.580075       |
| HEPG2           | 0.000591<br>↓***     | 0.001958<br>↓*** | 0.570509         | 0.381779         | 0.452142        | 0.288447    | 0.827872  | 0.943004       |
| Duplicate 2 24h |                      |                  |                  |                  |                 |             |           |                |
| LX2             | 0.000302<br>↓***     | 0.000493<br>↓*** | 0.001641<br>↓**  | 0.000520<br>↓**  | 0.001062<br>↓** | 0.263530    | 0.459452  | 0.048789<br>↓* |
| SKHEP           | 0.000005<br>↓***     | 0.000017<br>↓*** | 0.000171<br>↓*** | 0.003403<br>↓**  | 0.089980        | 0.423007    | 0.171031  | 0.309791       |
| HEPG2           | 0.000413<br>↓***     | 0.000283<br>↓*** | 0.130263         | 0.416992         | 0.799905        | 0.159974    | 0.339079  | 0.193787       |
| Duplicate 1 48h |                      |                  |                  |                  |                 |             |           |                |
| LX2             | 0.000064<br>↓***     | 0.000289<br>↓*** | 0.002609<br>↓**  | 0.006094<br>↓**  | 0.004276<br>↓** | 0.176328    | 0.991945  | 0.390000       |
| SKHEP           | 0.000017<br>↓***     | 0.000021<br>↓*** | 0.000038<br>↓*** | 0.004603<br>↓**  | 0.048843<br>↓*  | 0.057974    | 0.472784  | 0.634548       |
| HEPG2           | 0.000108<br>↓**<br>* | 0.000454<br>↓*** | 0.003706<br>↓**  | 0.840712         | 0.466975        | 0.221270    | 0.437520  | 0.830644       |
| Duplicate 2 48h |                      |                  |                  |                  |                 |             |           |                |
| LX2             | 0.000302<br>↓***     | 0.000493<br>↓*** | 0.001641<br>↓**  | 0.000520<br>↓*** | 0.001062<br>↓** | 0.263530    | 0.459452  | 0.048789       |
| SKHEP           | 0.000005<br>↓***     | 0.000017<br>↓*** | 0.000171<br>↓*** | 0.003403<br>↓**  | 0.089980        | 0.423007    | 0.171031  | 0.309791       |
| HEPG2           | 0.000413<br>↓***     | 0.000283<br>↓*** | 0.130263         | 0.416992         | 0.799905        | 0.159974    | 0.339079  | 0.193787       |

↑ - increased viability; ↓ - decreased viability; P-value <0.05 (\*), P-value <0.01 (\*\*) and P-value <0.001 (\*\*\*).  
Discovery determined using the Two-stage linear step-up procedure of Benjamini, Krieger and Yekutieli, with Q = 1%.  
Each row was analyzed individually, without assuming a consistent SD. Number of t tests: 3.

**Table S3.** Statistical analysis in the case of Lipo\_SOR treatments effect on 24 and 48 h.

| Cell line       | 15.08 $\mu$ M    | 13.17 $\mu$ M    | 11.28 $\mu$ M    | 9.4 $\mu$ M      | 7.51 $\mu$ M     | 5.64 $\mu$ M    | 3.76 $\mu$ M     | 1.88 $\mu$ M     |
|-----------------|------------------|------------------|------------------|------------------|------------------|-----------------|------------------|------------------|
| Duplicate 1 24h |                  |                  |                  |                  |                  |                 |                  |                  |
| LX2             | 0.004120<br>↓*** | 0.000160<br>↓*** | 0.672048         | 0.612151         | 0.984074         | 0.714449        | 0.000332<br>↑*** | 0.000898<br>↑*** |
| SKHEP           | 0.000004<br>↓*** | 0.000006<br>↓*** | 0.002297<br>↓**  | 0.018093<br>↓*   | 0.093159         | 0.038076<br>↓*  | 0.903695         | 0.011109<br>↑*   |
| HEPG2           | 0.005756<br>↓**  | 0.003551<br>↓**  | 0.145049         | 0.127007         | 0.076598         | 0.057279        | 0.901877         | 0.361602         |
| Duplicate 2 24h |                  |                  |                  |                  |                  |                 |                  |                  |
| LX2             | 0.007062<br>↓**  | 0.001828<br>↓**  | 0.562223         | 0.182374         | 0.177440         | 0.610755        | 0.003986<br>↑**  | 0.034356<br>↑*   |
| SKHEP           | 0.000048<br>↓*** | 0.000018<br>↓*** | 0.001027<br>↓**  | 0.000934<br>↓*** | 0.021367<br>↓*   | 0.002733<br>↓** | 0.554501         | 0.066765         |
| HEPG2           | 0.002364<br>↓**  | 0.000267<br>↓*** | 0.146928         | 0.010949<br>↓*   | 0.348438         | 0.101571        | 0.026474<br>↑*   | 0.021574<br>↑*   |
| Duplicate 1 48h |                  |                  |                  |                  |                  |                 |                  |                  |
| LX2             | 0.001312<br>↓*** | 0.020901<br>↓*   | 0.010244<br>↓*   | 0.112281         | 0.146689         | 0.874352        | 0.008119<br>↑**  | 0.000603<br>↑*** |
| SKHEP           | 0.000036<br>↓*** | 0.000048<br>↓*** | 0.000050<br>↓*** | 0.000347<br>↓*** | 0.000917<br>↓*** | 0.408659        | 0.464314         | 0.393643         |
| HEPG2           | 0.000127<br>↓*** | 0.000143<br>↓*** | 0.000176<br>↓*** | 0.006473<br>↓**  | 0.036219<br>↓*   | 0.685431        | 0.704974         | 0.930465         |
| Duplicate 2 48h |                  |                  |                  |                  |                  |                 |                  |                  |
| LX2             | 0.013747<br>↓*   | 0.062985         | 0.295600         | 0.428195         | 0.835431         | 0.569662        | 0.505756         | 0.012286<br>↑*   |
| SKHEP           | 0.000028<br>↓*** | 0.000015<br>↓*** | 0.000010<br>↓*** | 0.000220<br>↓*** | 0.000260<br>↓*** | 0.548100        | 0.167830         | 0.342118         |
| HEPG2           | 0.000096<br>↓*** | 0.000087<br>↓*** | 0.000082<br>↓*** | 0.018249<br>↓*   | 0.097682         | 0.912583        | 0.502474         | 0.586861         |

↑ - increased viability; ↓ - decreased viability; P-value <0.05 (\*), P-value <0.01 (\*\*) and P-value <0.001 (\*\*\*).

Discovery determined using the Two-stage linear step-up procedure of Benjamini, Krieger and Yekutieli, with Q = 1%.

Each row was analyzed individually, without assuming a consistent SD. Number of t tests: 3.
